# Supplementary material for: A rapid analytical method for characterization and simultaneous quantitative determination of phytoconstituents in Piper betle landraces using UPLC-ESI-MS/MS
Source: Royal Society of Chemistry journal article supplement (doi:10.1039/c4ay00975d), 2014-01-01

### Supplementary data

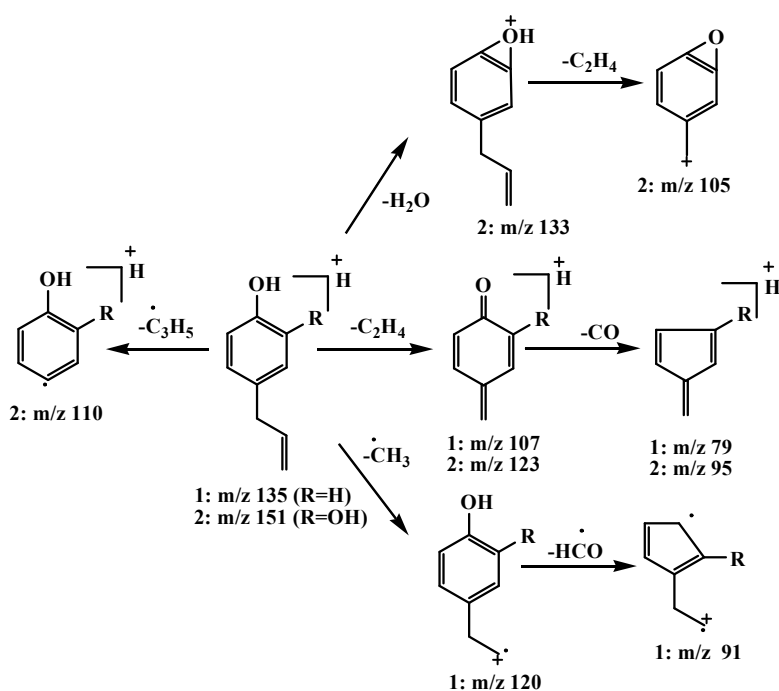

**Scheme S1:** Proposed ESI-MS/MS fragmentation pathway for Chavicol (1) and Hydroxychavicol (2)

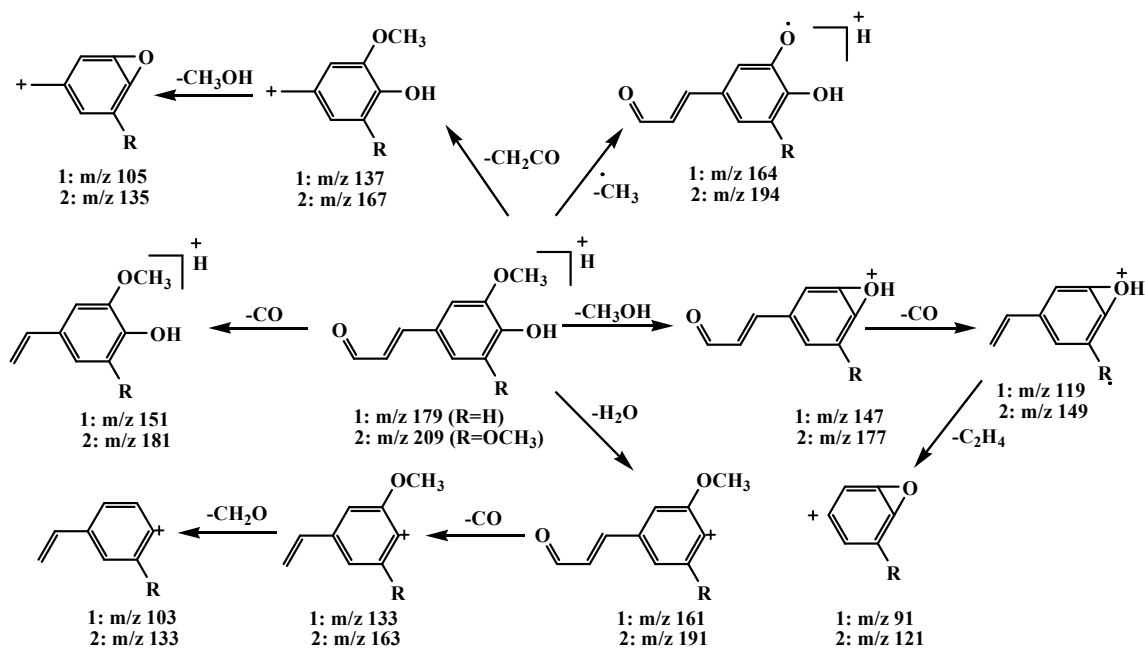

**Scheme S2:** Proposed ESI-MS/MS fragmentation pathway for Coniferaldehyde (1) and Sinapinaldehyde (2).

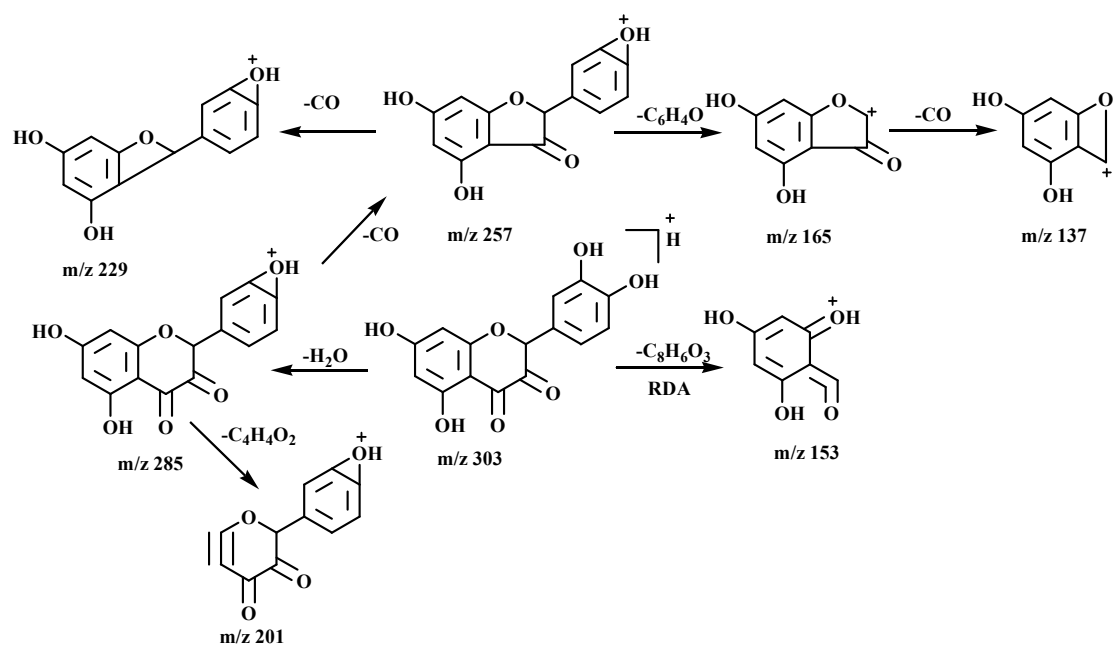

**Scheme S3:** Proposed ESI-MS/MS fragmentation pathway for Quercetin.

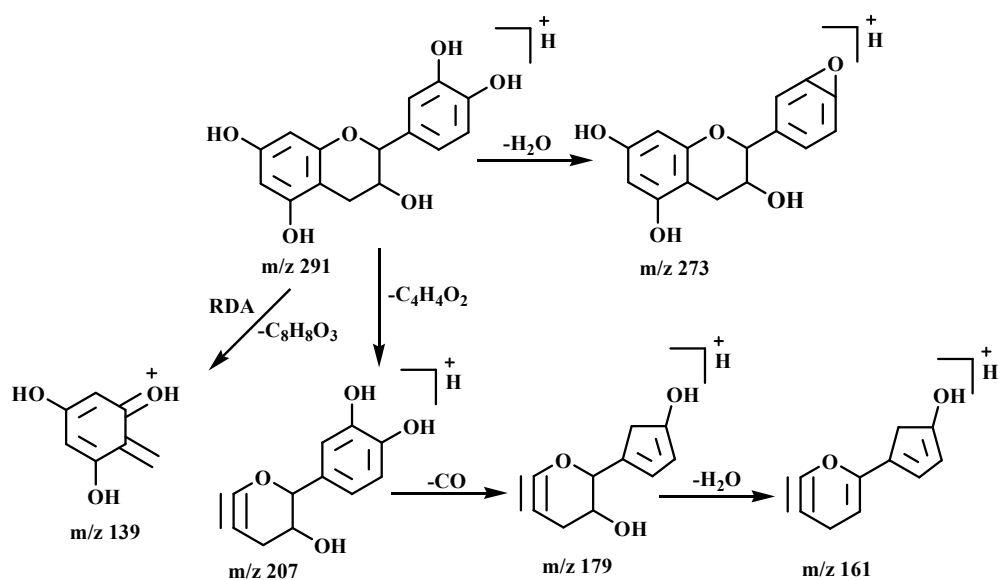

**Scheme S4:** Proposed ESI-MS/MS fragmentation pathway for Catechin.

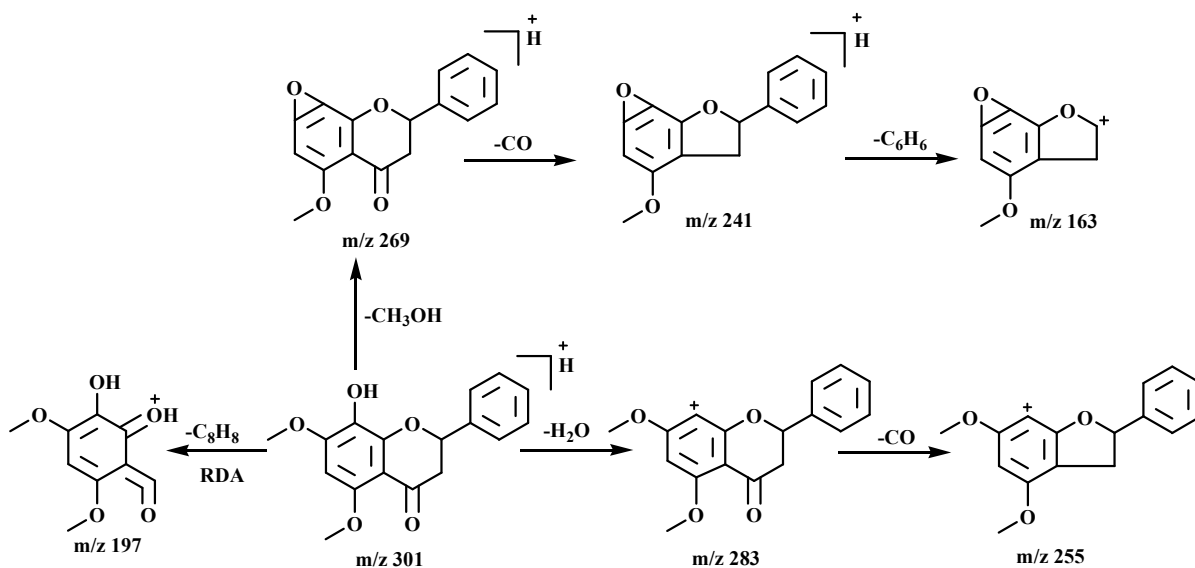

**Scheme S5:** Proposed ESI-MS/MS fragmentation pathway for 8-Hydroxy-5, 7-dimethoxyflavanone.

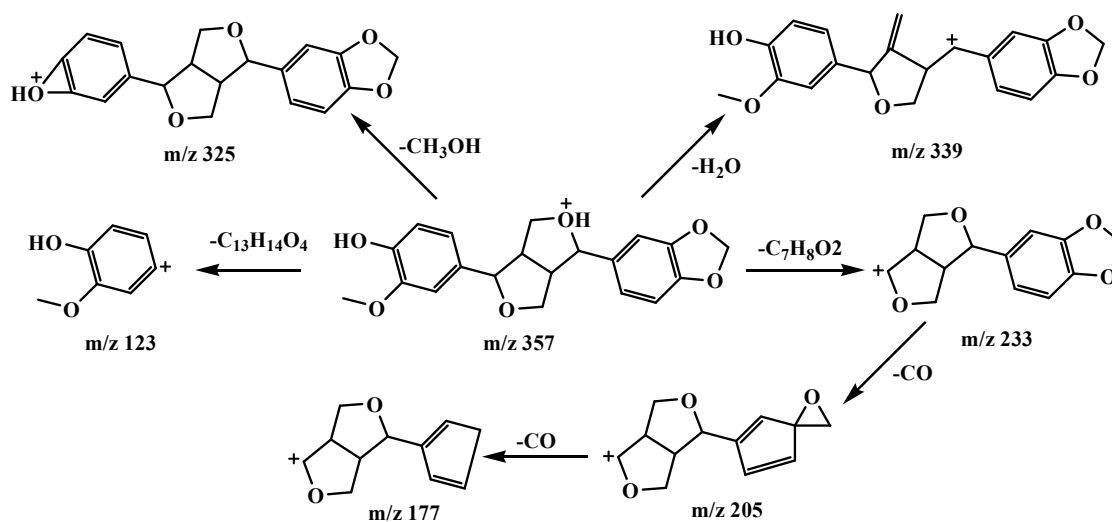

**Scheme S6:** Proposed ESI-MS/MS fragmentation pathway for Pluviatilol.

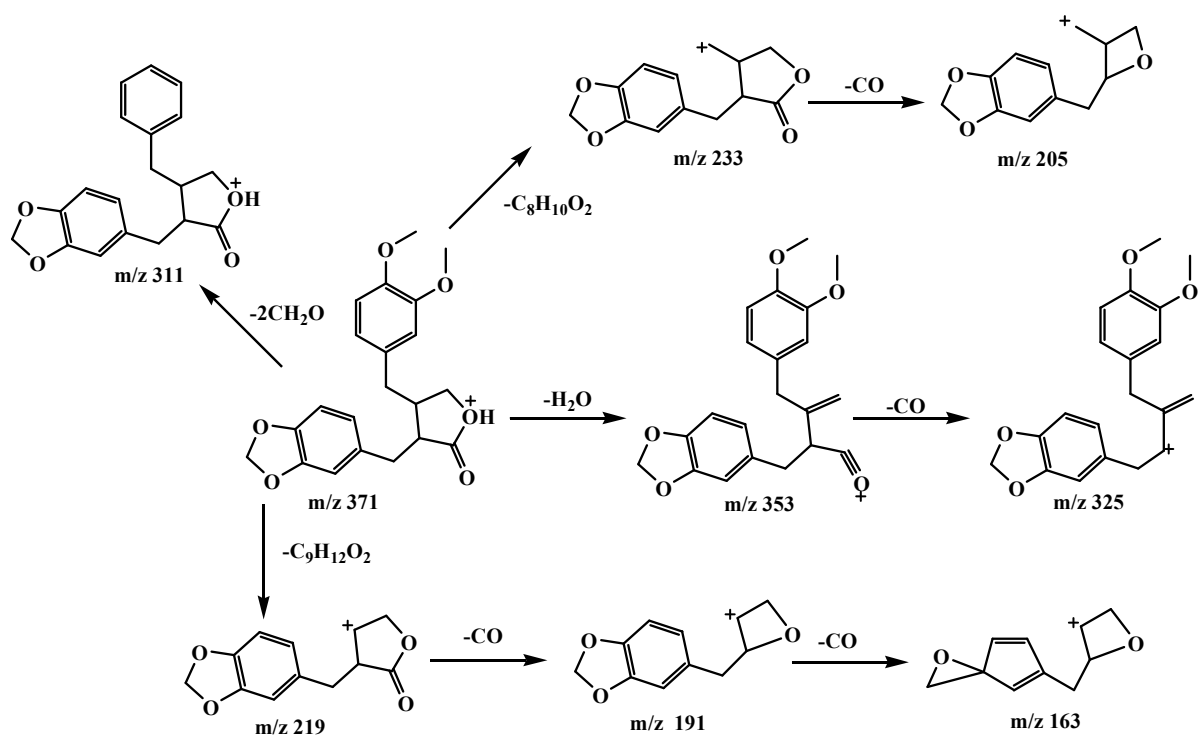

**Scheme S7:** Proposed ESI-MS/MS fragmentation pathway for Kusunokinin.

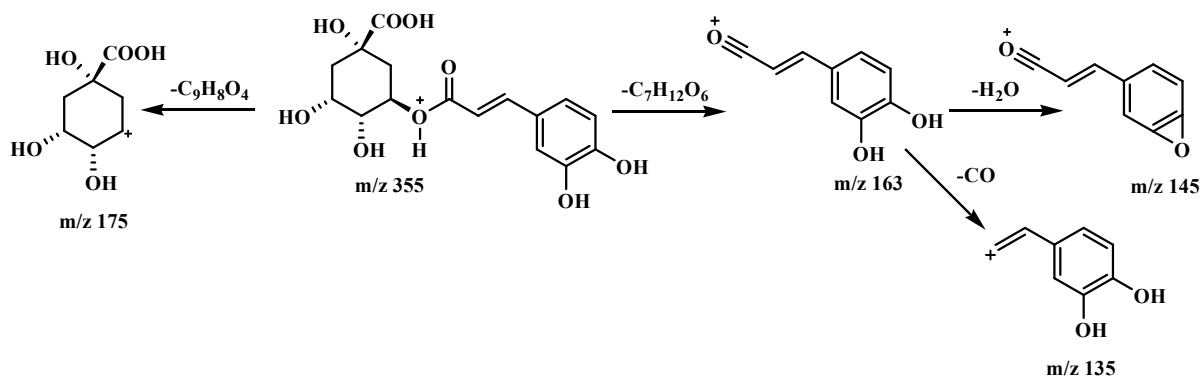

**Scheme S8:** Proposed ESI-MS/MS fragmentation pathway for Chlorogenic acid.

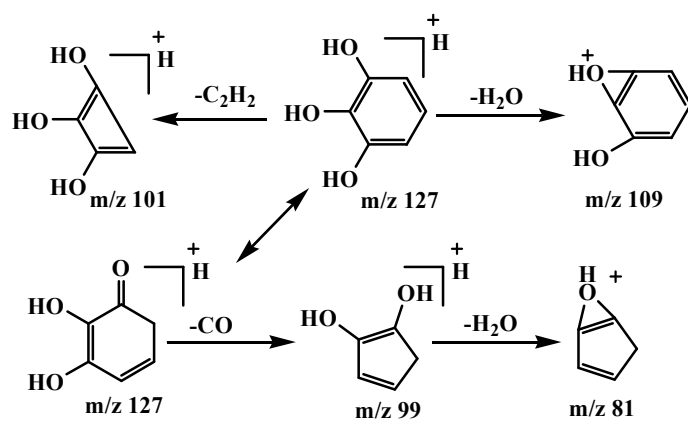

**Scheme S9:** Proposed ESI-MS/MS fragmentation pathway for Pyrogallol.

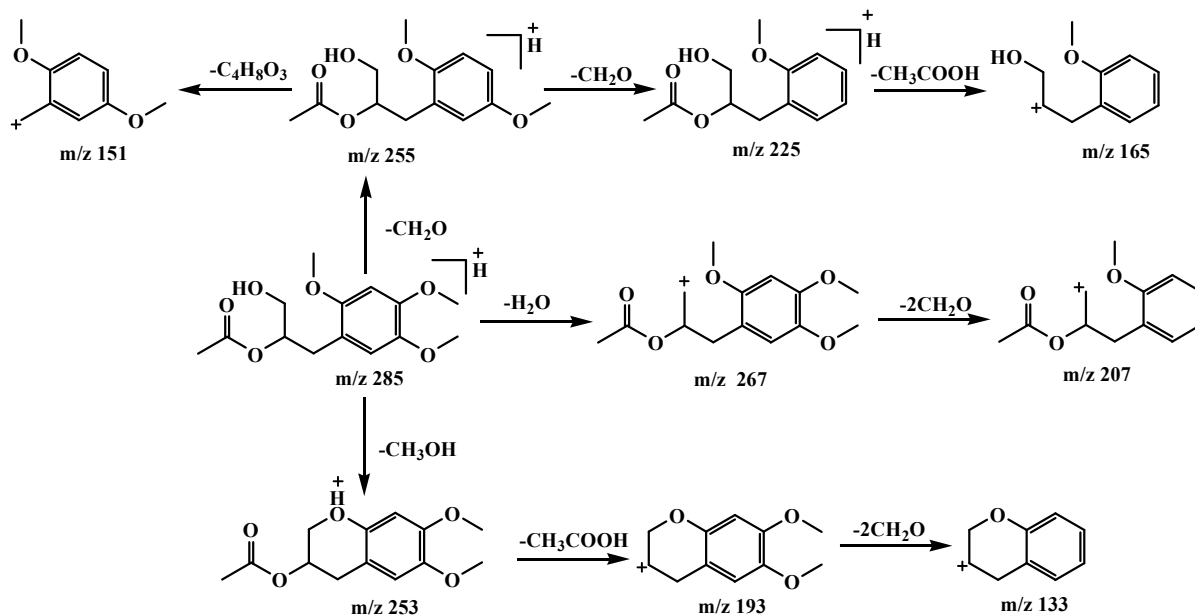

**Scheme S10:** Proposed ESI-MS/MS fragmentation pathway for 3-(2, 4, 5-Trimethoxyphenyl)-2-acetoxy-1-hydroxypropane

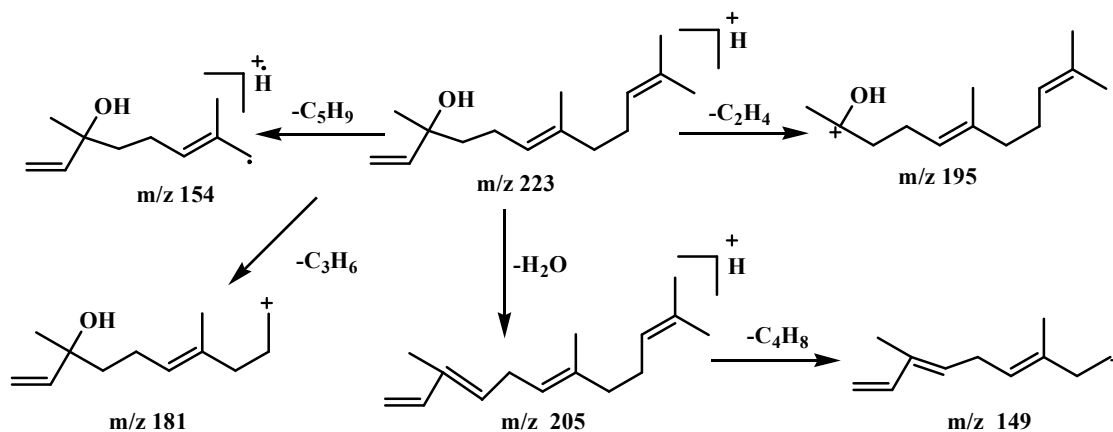

**Scheme S11:** Proposed ESI-MS/MS fragmentation pathway for Nerolidol.

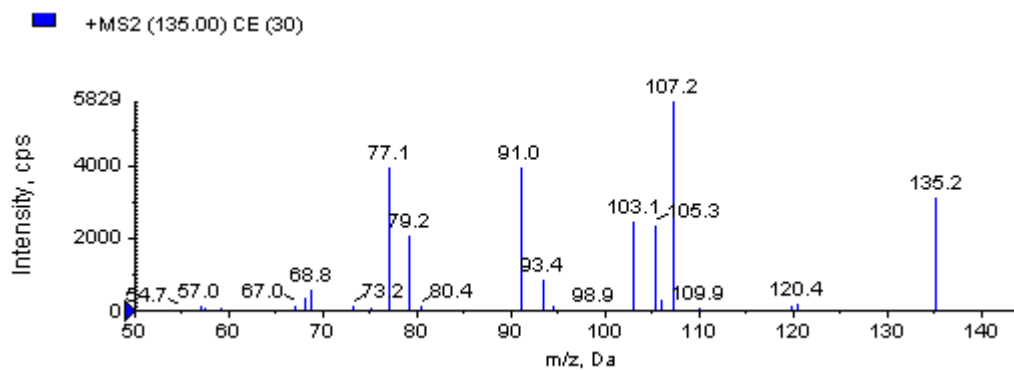

MS2 Spectra of Chavicol (m/z 135).

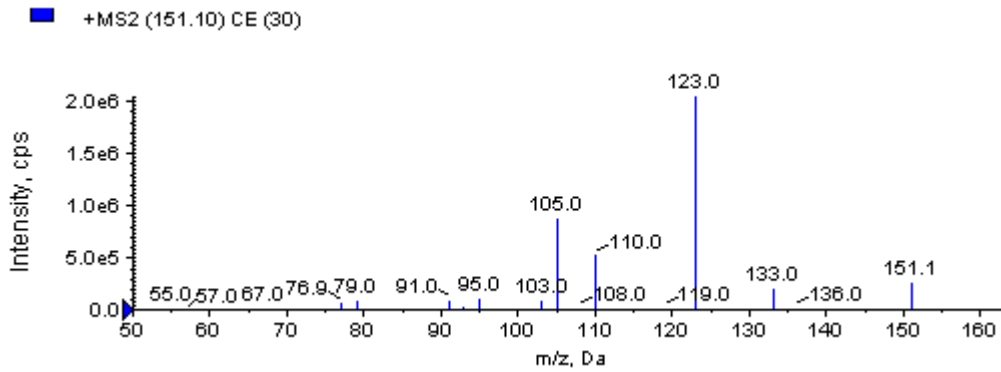

MS2 Spectra of Hydroxychavicol (m/z 151).

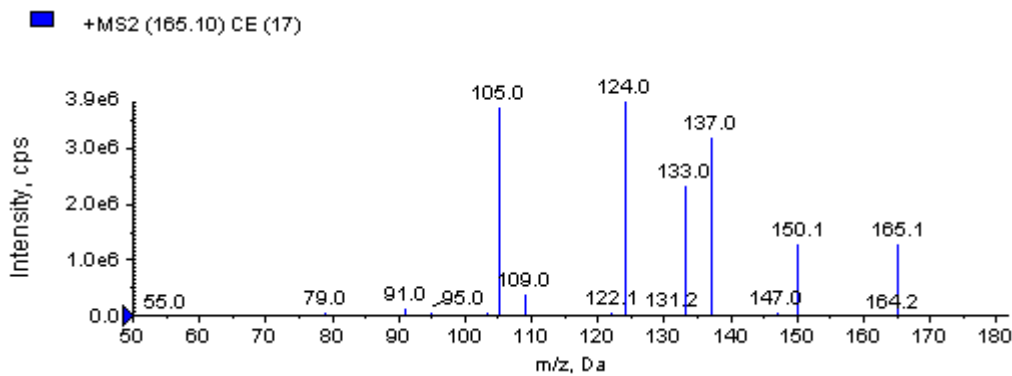

MS2 Spectra of Eugenol (m/z 165).

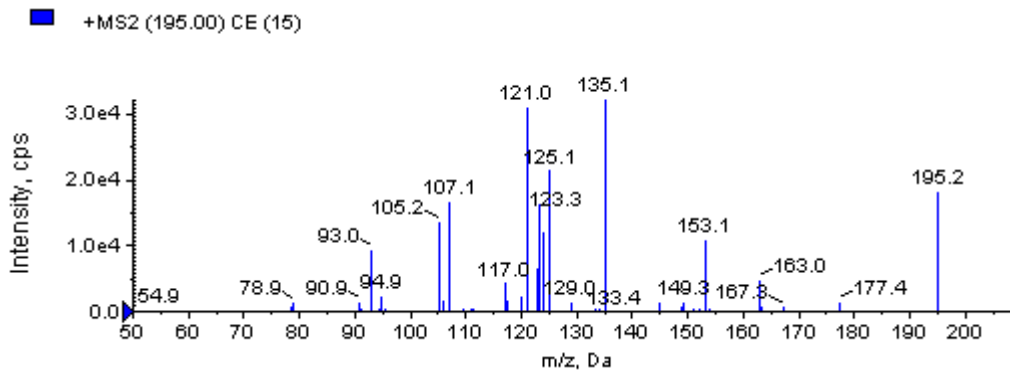

MS2 Spectra of Methoxy eugenol (m/z 195).

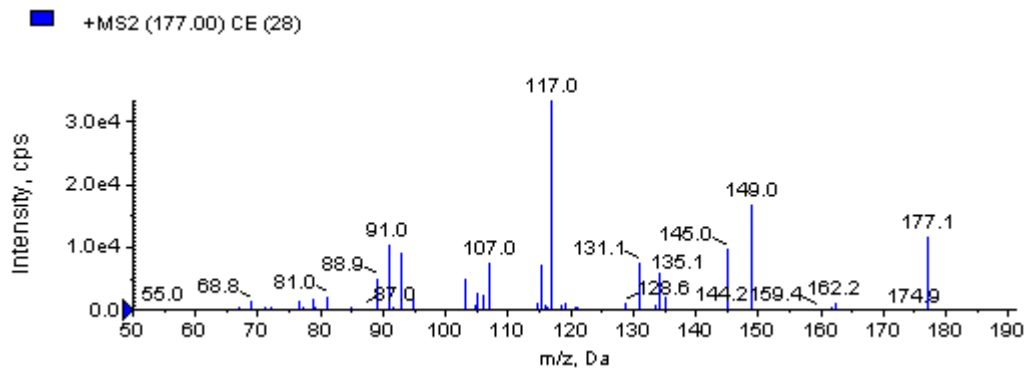

MS2 Spectra of Chavicol acetate (m/z 177).

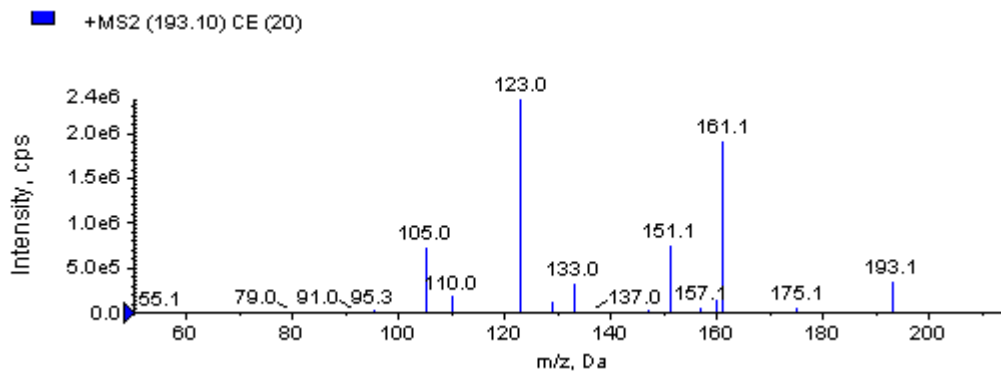

MS2 Spectra of Allylpyrocatechol monoacetate (m/z 193).

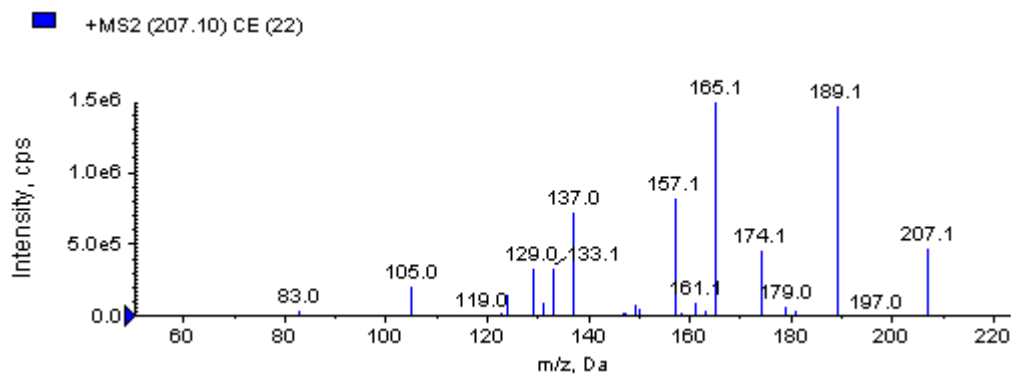

MS2 Spectra of Eugenyl acetate (m/z 207).

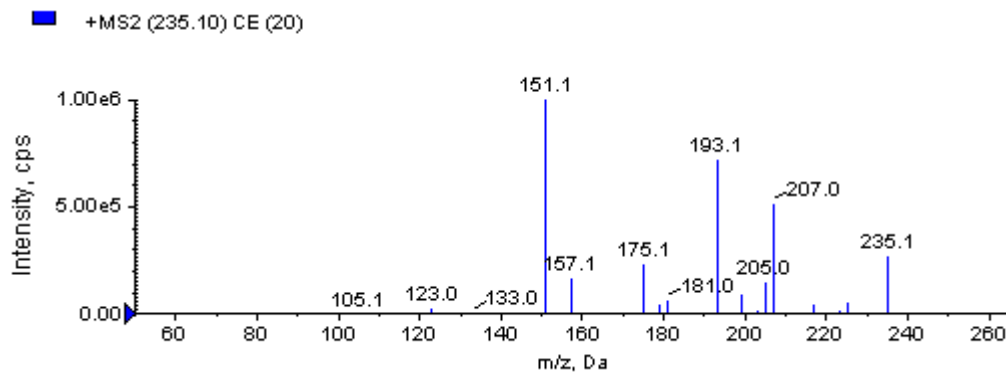

MS2 Spectra of Allylpyrocatechol-3, 4-diacetate (m/z 235).

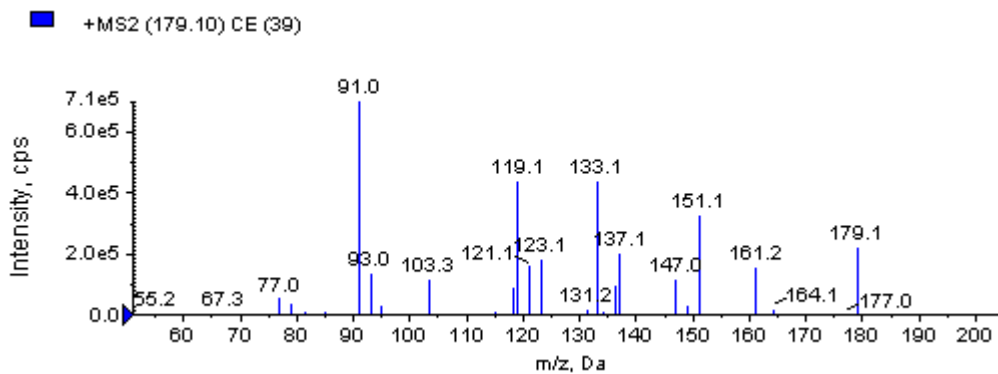

MS2 Spectra of Coniferaldehyde (m/z 179).

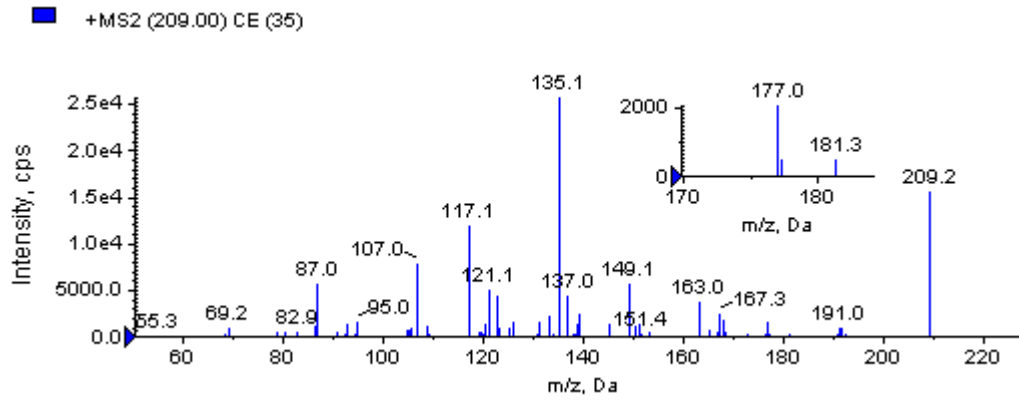

MS2 Spectra of Sinapinaldehyde (m/z 209).

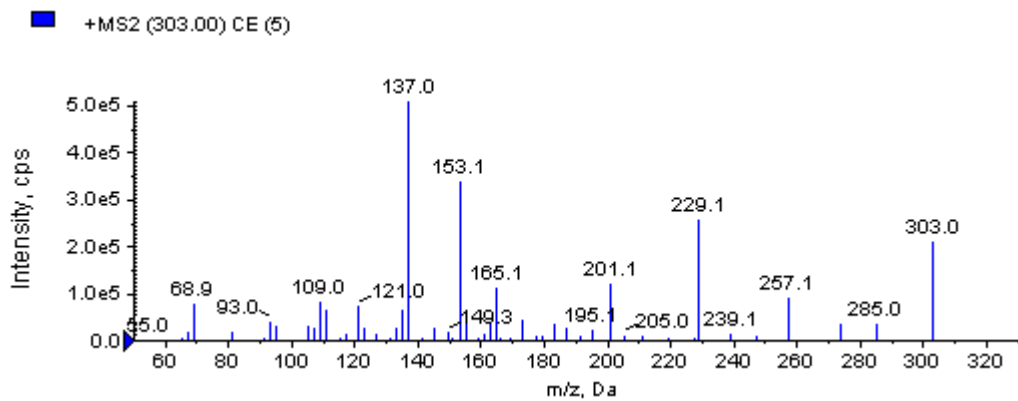

MS2 Spectra of Quercetin (m/z 303).

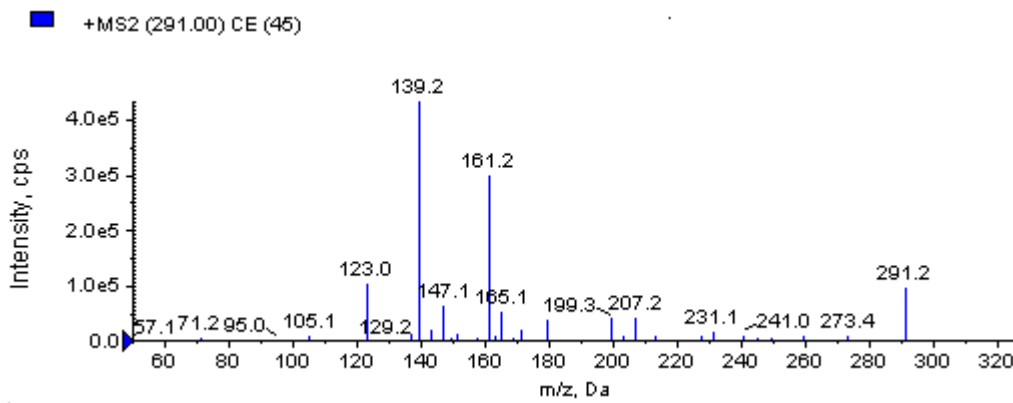

MS2 Spectra of Catechin (m/z 291).

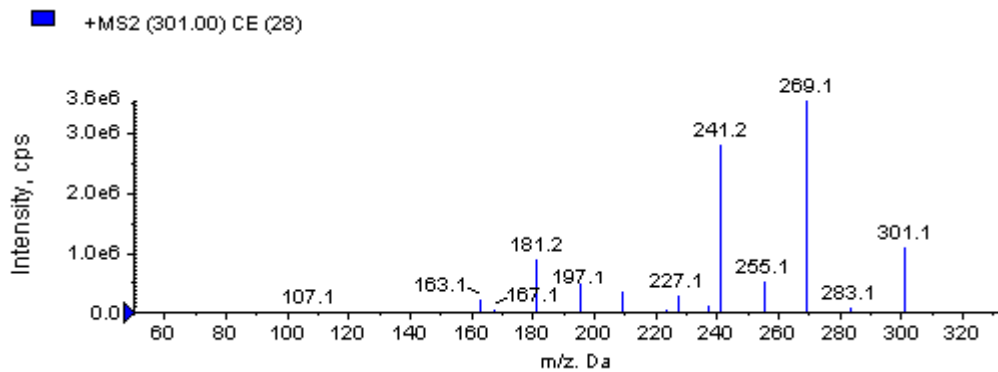

MS2 Spectra of 8-Hydroxy-5, 7-dimethoxyflavanone (m/z 301).



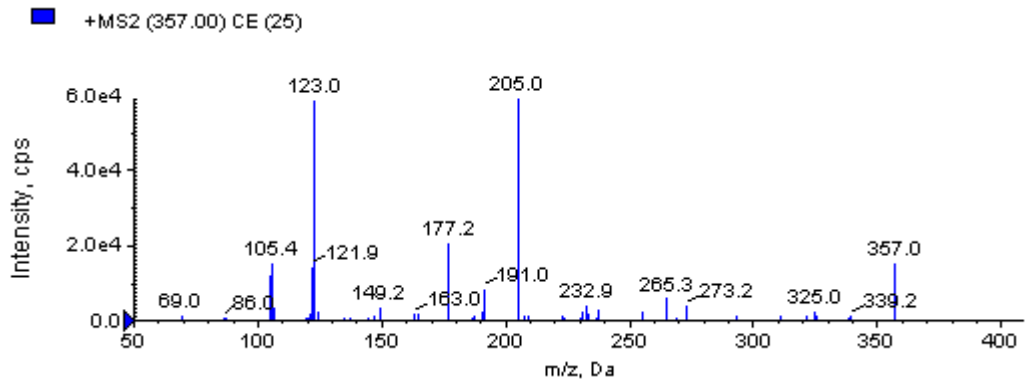

MS2 Spectra of Pluviatilol (m/z 357).

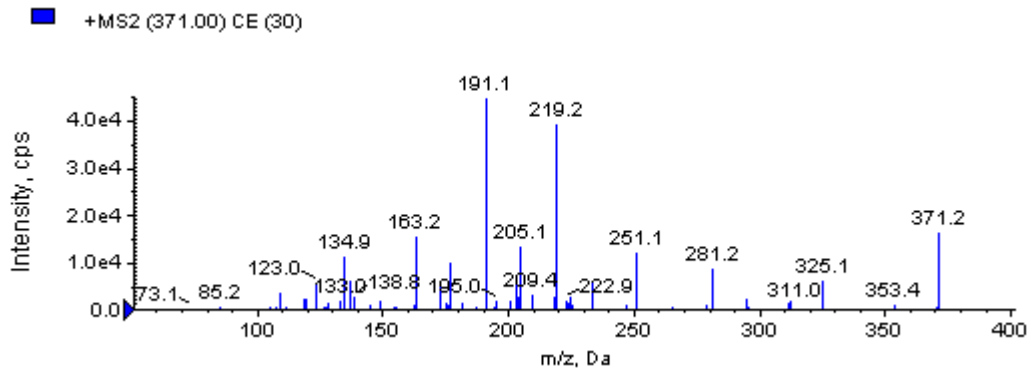

MS2 Spectra of Kusunokinin (m/z 371).

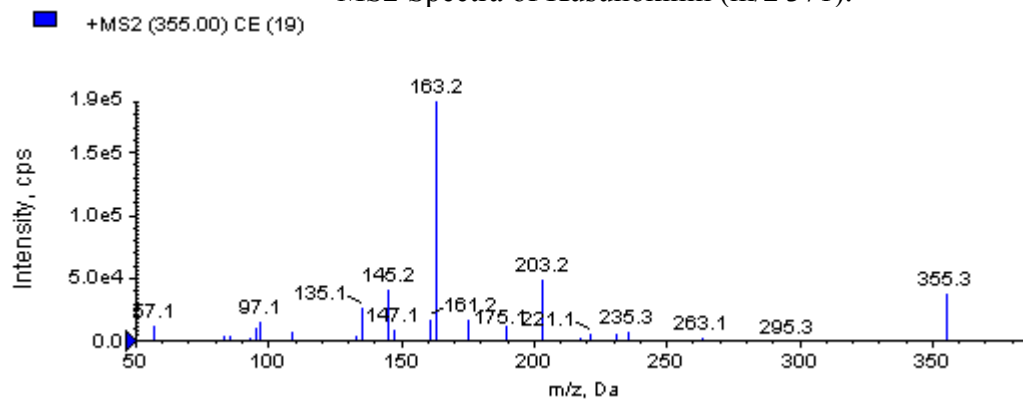

MS2 Spectra of Chlorogenic acid (m/z 355).

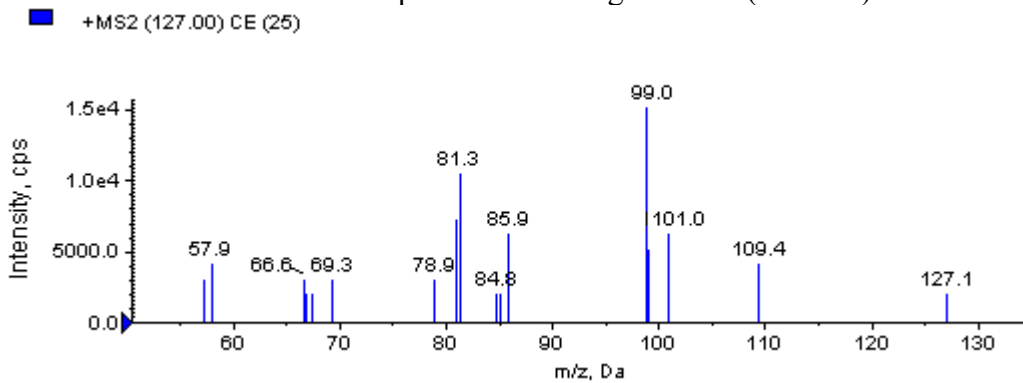

MS2 Spectra of Pyrogallol (m/z 127).

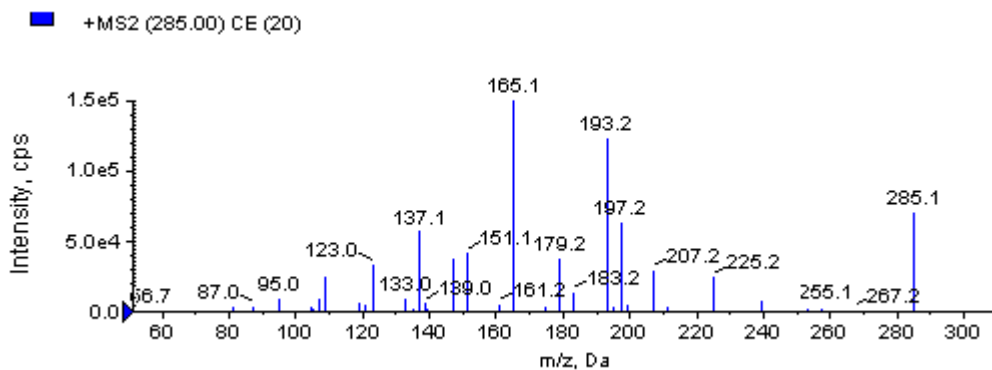

MS2 Spectra of 3-(2, 4, 5-Trimethoxyphenyl)-2-acetoxy-1-hydroxypropane (m/z 285).

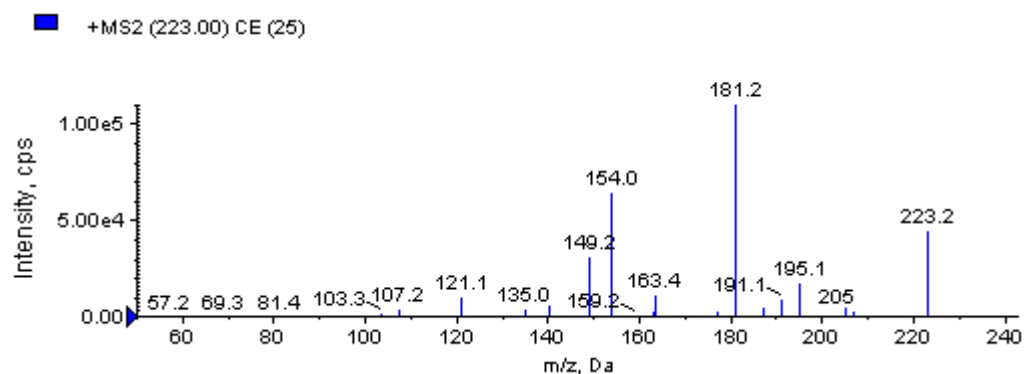

MS2 Spectra of Nerolidol (m/z 223).

**Response factor for different concentrations**

**Response Factor**

| Allylpyrocatechol-<br>3, 4-diacetate | Eugenyl acetate | Eugenol |
|--------------------------------------|-----------------|---------|
| 26.2                                 | 1.3             | 0.1     |
| 26.3                                 | 1.3             | 0.2     |
| 26.4                                 | 1.3             | 0.2     |
| 25.8                                 | 1.3             | 0.2     |
| 25.7                                 | 1.3             | 0.2     |
| 25.5                                 | 1.2             | 0.2     |
| 24.6                                 | 1.1             | 0.2     |

**Residual analysis was performed to ascertain linearity**

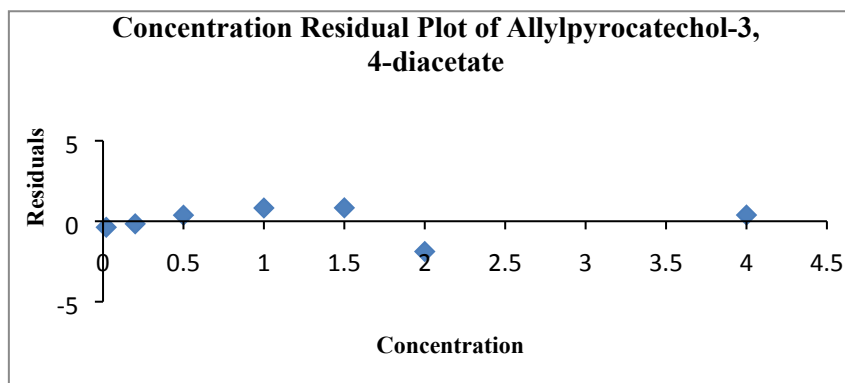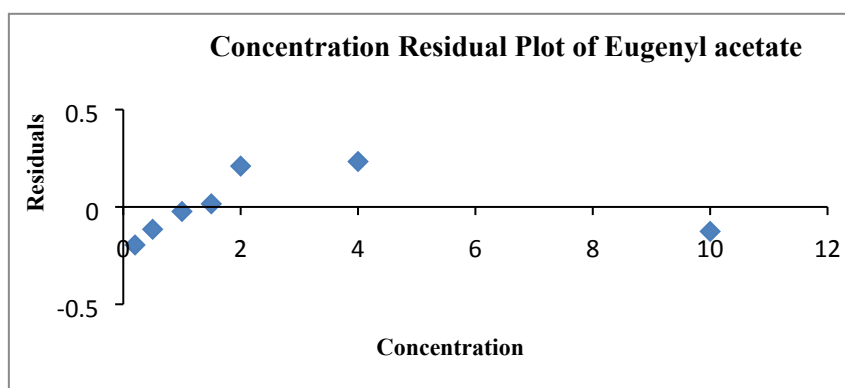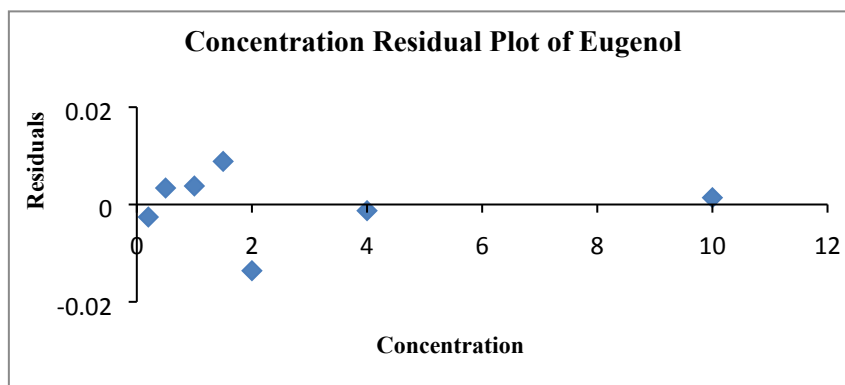

**Figure S1. Concentration Vs Residual plot of allylpyrocatechol-3, 4-diacetate, eugenyl acetate and eugenol.**

**Results of column and MP screening :** UPLC chromatograms of *Piper betle* (Bangladeshi) leaf extract

**Column:** ACQUITY BEH C18 column (50 mm × 2.1 mm, 1.7 μm), **Mobile phase:** Water–methanol

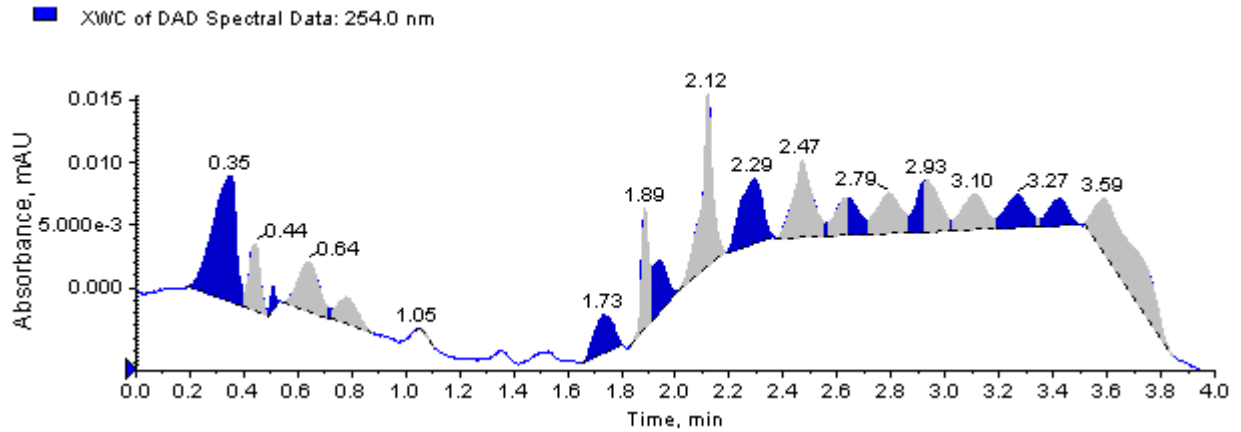

**Column:** ACQUITY BEH C18 column (50 mm × 2.1 mm, 1.7 μm), **Mobile phase:** 0.1% formic acid in water (A) – methanol (B)

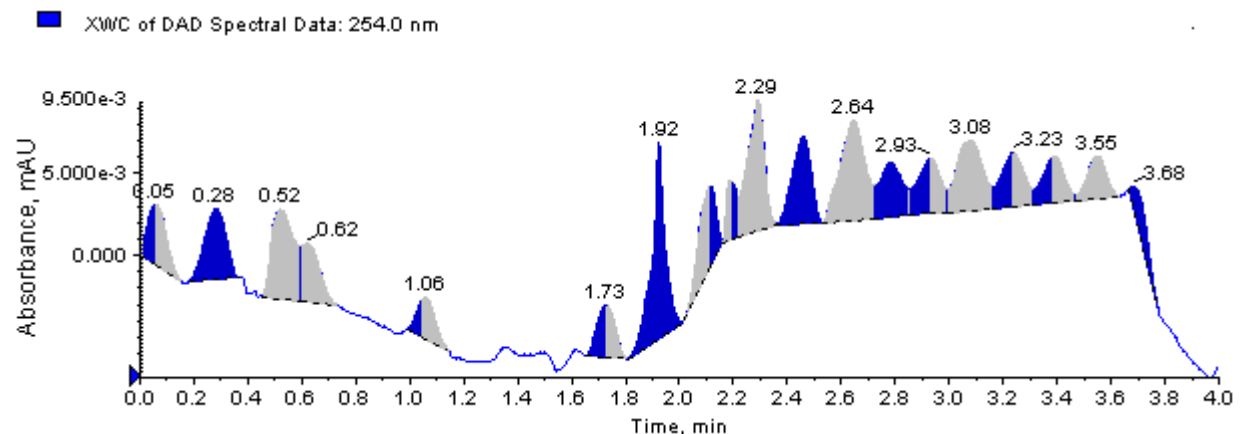

**Column:** ACQUITY BEH C18 column (50 mm × 2.1 mm, 1.7 μm), **Mobile phase:** Water (A)-acetonitrile (B)

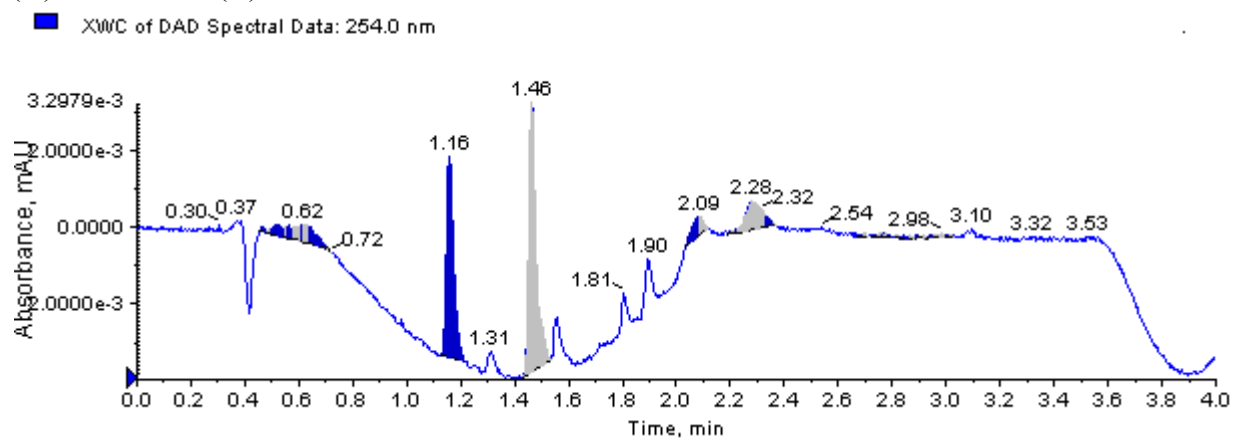

**Column:** ACQUITY BEH C18 column (50 mm × 2.1 mm, 1.7 μm), **Mobile phase:** 0.1% formic acid in water (A) – acetonitrile (B)

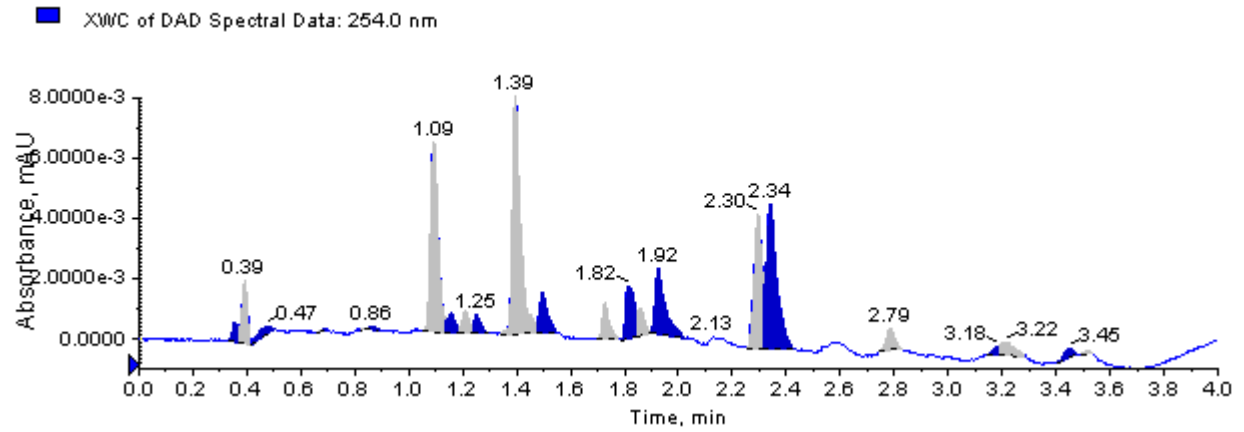

**Column:** ACQUITY CSH C18 (100 mm × 2.1 mm, 1.7 μm), **Mobile phase:** 0.1% formic acid in water (A) – acetonitrile (B)

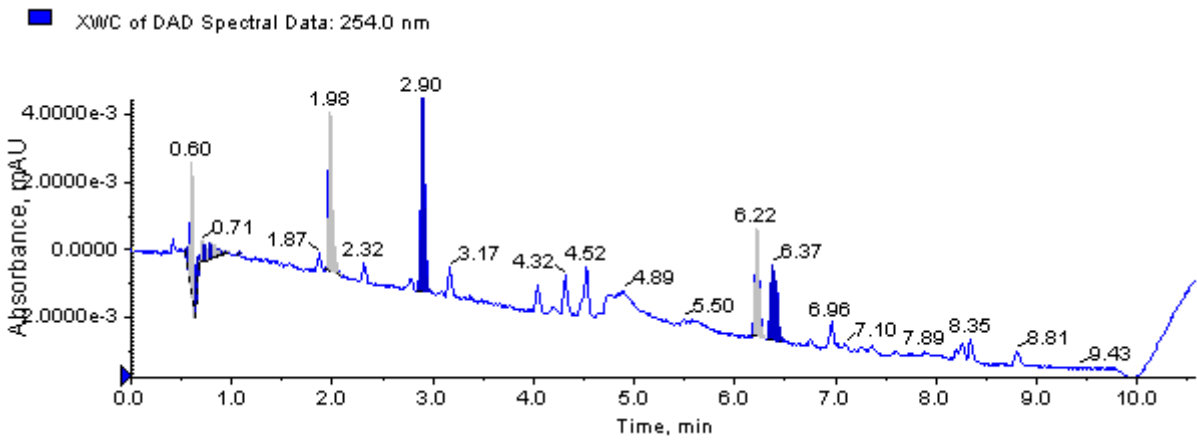

Supplement: c4ay00975d1.pdf [file c4ay00975d1.pdf]
